# Supplementary material for: Distinct roles of 1α and 1β heavy chains of the inner arm dynein I1 of Chlamydomonas flagella
Source: PubMed Central journal article supplement — Mol Biol Cell. 2011 Feb 1;22(3):342–53. doi: 10.1091/mbc.E10-10-0806 (PMC3031465; doi:10.1091/mbc.e10-10-0806), 2011-02-01
Supplement: E10-10-0806_1.pdf [file E10-10-0806_1.pdf]

**A.**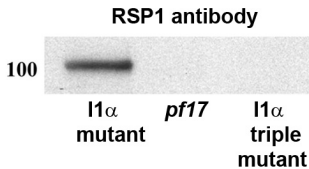**B.**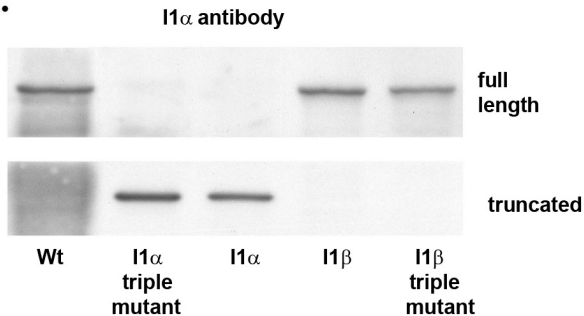

Fig. S1 Toba et al.,

**A**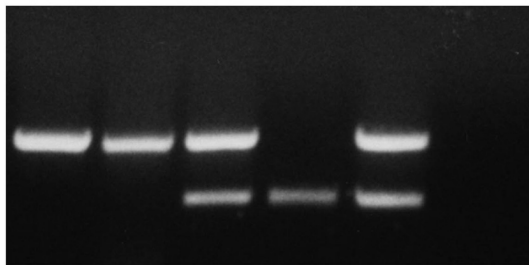

Wt

*pf17**l1β*  
mutant*ida 2-6**l1β*  
triple  
mutant

control

**B**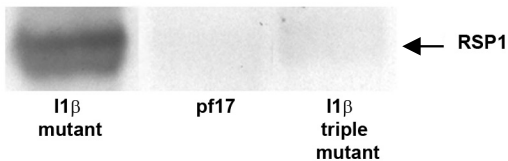*l1β*  
mutant*pf17**l1β*  
triple  
mutant

← RSP1

Fig. S 2 Toba et al.,
